# Supplementary material for: The Distance between N and C Termini of Tau and of FTDP-17 Mutants Is Modulated by Microtubule Interactions in Living Cells
Source: PubMed Central journal article supplement (PMC5492851; doi:10.3389/fnmol.2017.00210), 2017-06-30
Supplement: Presentation_1.pdf [file Presentation_1.pdf]

Supplementary Figure 1

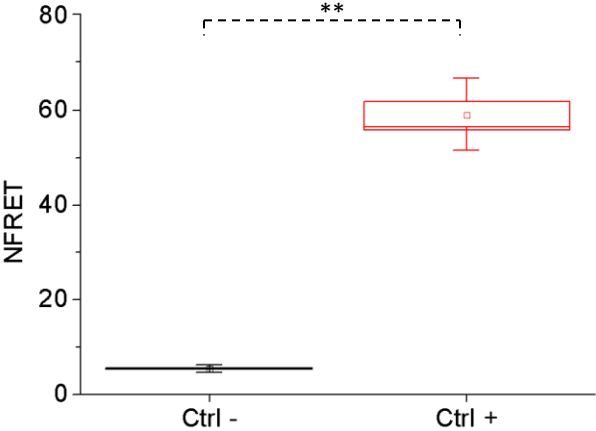

Supplementary Figure 2

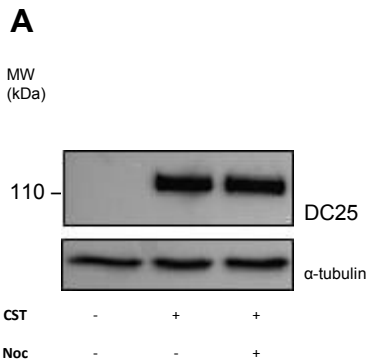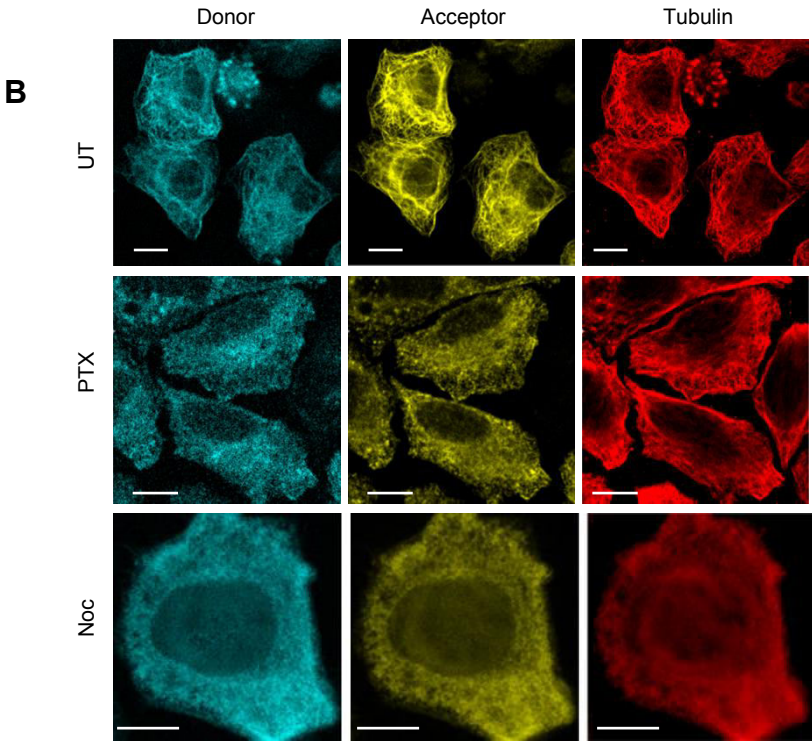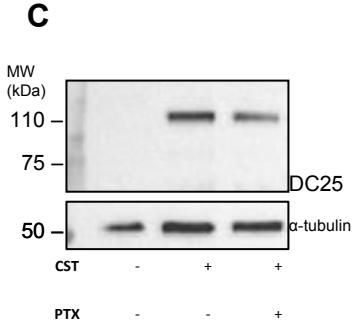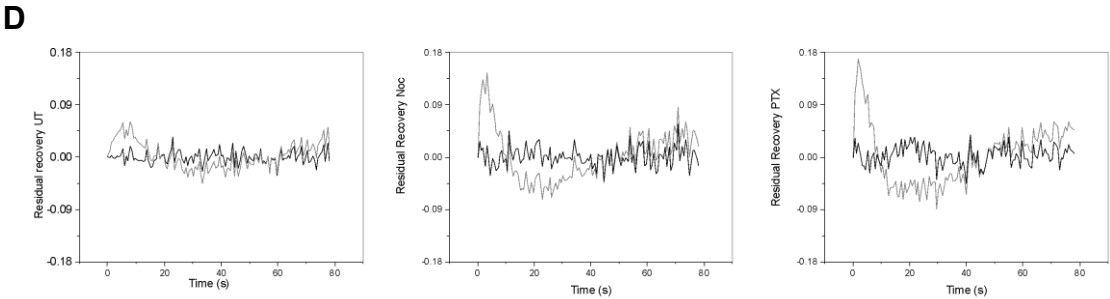

# Supplementary Figure 3

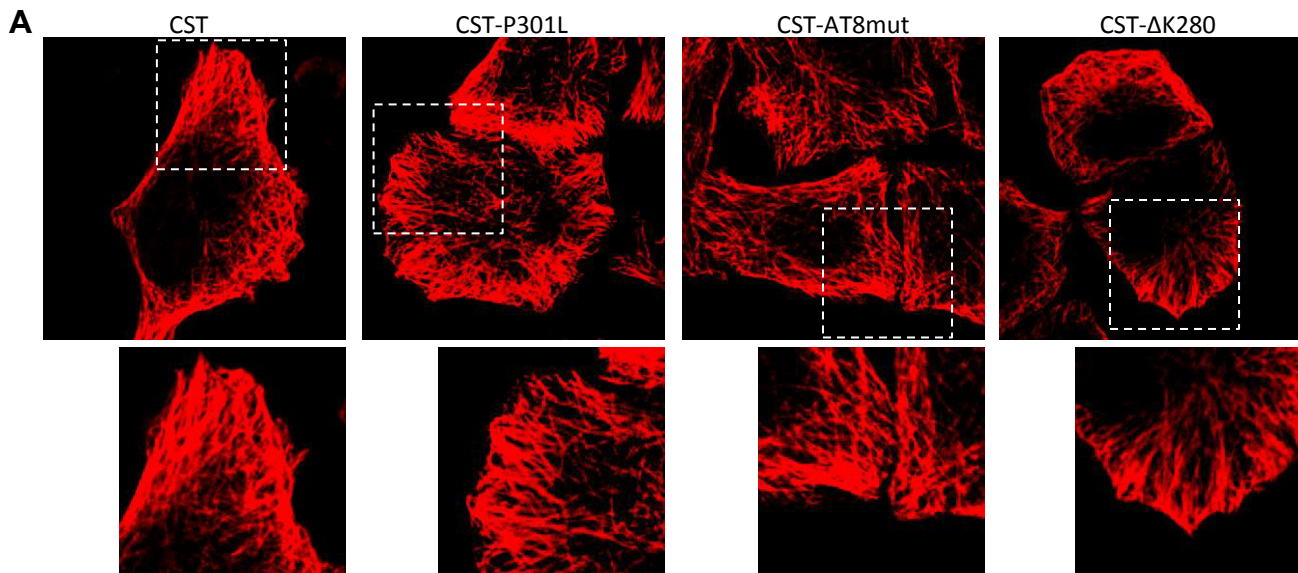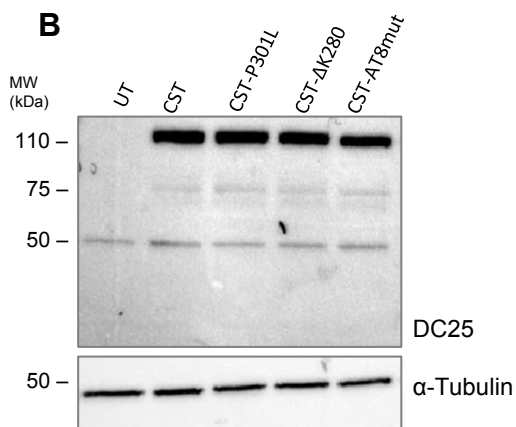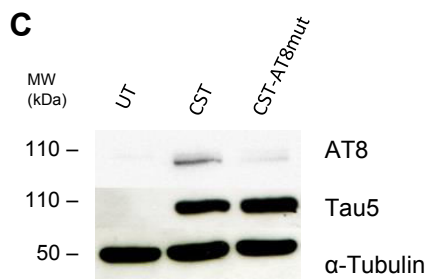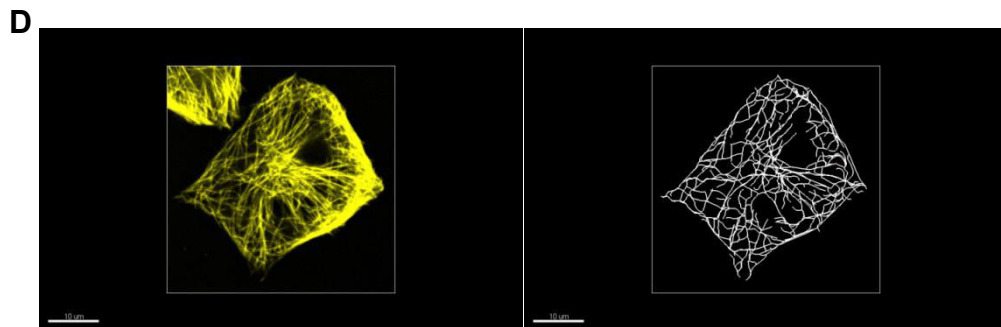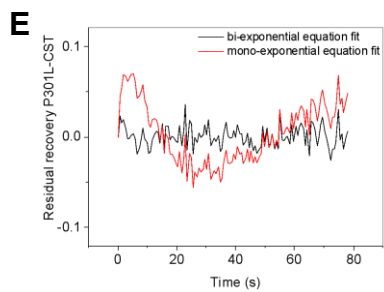

|                      | <b>Mob<sub>calc</sub> (%)</b> | <b>A<sub>1</sub>(%)</b> | <b>A<sub>2</sub>(%)</b> | <b><math>\tau_1</math>(s)</b> | <b><math>\tau_2</math>(s)</b> |
|----------------------|-------------------------------|-------------------------|-------------------------|-------------------------------|-------------------------------|
| <b>CST</b>           | 76±3                          | 27.8±4.1                | 72±5                    | 4.99±0.6                      | 35.2±2.8                      |
| <b>NOC treatment</b> | 91±4                          | 53±5                    | 47±4                    | 3.3±0.5                       | 28±2                          |
| <b>PTX treatment</b> | 93±3                          | 55±3                    | 45±3                    | 2.9±0.6                       | 29.5±1.5                      |
| <b>CST-P301L</b>     | 85±3                          | 47.4±4.1                | 52.6±3.4                | 4.5±0.3                       | 33.2±2.8                      |
| <b>CST-ΔK280</b>     | 89±3                          | 47±3                    | 53±3                    | 3.6±0.1                       | 29±1                          |
| <b>CST-AT8mut</b>    | 54±1                          | 7.5±0.5                 | 92.5±1.8                | 2.8±0.2                       | 39.7±0.9                      |

Supplementary Table 1
